# Supplementary material
Source: MDPI journal article supplement (https://www.mdpi.com/1424-2818/14/8/601)
Supplement: s1 [file s1]

Table S1. The species used for Phylogenetic analysis.

| Species                           | Family                      | Order        | Genbank<br>number | accession |
|-----------------------------------|-----------------------------|--------------|-------------------|-----------|
| <i>Coniothyrium glycines</i>      | <i>Coniothyriaceae</i>      | Pleosporales | NC_040008         |           |
| <i>Corynespora cassicola</i>      | <i>Corynesporascaceae</i>   | Pleosporales | NC_056323         |           |
| <i>Didymella pinodes</i>          | <i>Didymellaceae</i>        | Pleosporales | NC_029396         |           |
| <i>Phaeosphaeria nodorum</i>      | <i>Phaeosphaeriaceae</i>    | Pleosporales | NC_009746         |           |
| <i>Pithomyces chartarum</i>       | <i>Astrosphaeriellaceae</i> | Pleosporales | NC_035636         |           |
| <i>Shiraia bambusicola</i>        | <i>Shiraiaceae</i>          | Pleosporales | NC_026869         |           |
| <i>Stemphylium lycopersici</i>    | <i>Pleosporaceae</i>        | Pleosporales | NC_036039         |           |
| <i>Paraconiothyrium</i> sp.       | <i>Didymosphaeriaceae</i>   | Pleosporales | OM617730          |           |
| <i>Bipolaris sorokiniana</i>      | <i>Pleosporaceae</i>        | Pleosporales | NC_047242         |           |
| <i>Bipolaris oryzae</i>           | <i>Pleosporaceae</i>        | Pleosporales | NC_057095         |           |
| <i>Bipolaris cookei</i>           | <i>Pleosporaceae</i>        | Pleosporales | NC_036417         |           |
| <i>Rhynchosporium orthosporum</i> | <i>Ploettnerulaceae</i>     | Helotiales   | NC_023127         |           |

Table S2. Base composition and skew of the mitochondrial genome.

|              | A%    | T%    | G%    | C%    | AT%   | GC%   | AT skew | GC skew |
|--------------|-------|-------|-------|-------|-------|-------|---------|---------|
| whole genome | 35.84 | 36.29 | 13.78 | 14.09 | 72.13 | 27.87 | -0.006  | -0.01   |
| PCGs         | 32.93 | 38.33 | 14.78 | 13.96 | 71.26 | 28.74 | -0.07   | 0.03    |

Table S3. The genome size and the number of introns of four species from Pleosporales.

| Species                      | Mitochondrial genome size (bp) | Number of introns |
|------------------------------|--------------------------------|-------------------|
| <i>Shiraia bambusicola</i>   | 39,030                         | 1                 |
| <i>Phaeosphaeria nodorum</i> | 49,761                         | 5                 |
| <i>Didymella pinodes</i>     | 55,973                         | 15                |
| <i>Bipolaris cookei</i>      | 135,790                        | 33                |
